# Supplementary material for: ‘The way they treat us is worse than the disease’: A qualitative study of the experiences of people with drug-resistant tuberculosis at healthcare facilities in Lagos, Nigeria
Source: Research Square preprint supplement (doi:10.21203/rs.3.rs-6397399/v1), 2025-05-08
Supplement: Supplementary file 1 [file 7f45e023c28f40fd52134e7a.docx]

**Focus Group Discussion Guide**

**Introduction:** Good morning/afternoon. My name is Olusola, and I will interview you today. My colleagues and I are researching TB-related stigma, and we would like you to share your experience with us. I will start with some general questions, then I will go into more detail about your experiences as a MDR-TB patient. Before we begin, I would like to remind you how grateful we are for your time and that there are no wrong or right answers. This is a time for you to share your story and your knowledge. This interview will be audio recorded. I want to reassure you that anything you say will be treated in confidence and that your name will not be on any documents related to the study. You can skip questions if you feel uncomfortable, or you can ask me to explain a question if it’s unclear. Thank you for completing the consent form.

| **Key area of investigation** | **Rationale** | **Themes** | **Example Questions** |
| --- | --- | --- | --- |
| **WARM-UP**  **RAPPORT**  **Basic background questions** | To learn the basic characteristics of the participants and start to make them feel comfortable | - Income - Education - MDR-TB treatment months - Age | - Can you tell me a bit about yourself? - What do you do for work? - How are you feeling this day? |
| **Daily life and social circle** | To explore their household and social networks. This will be used to identify potential enacted stigma sources or treatment support networks later in the interview | - Household - Relationships - Social activities | - Can you tell me about your home? Whom do you live with? - How is your relationship with your partner? - How many children do you have? - What do you like to do for fun? With whom |
| **BACKSTORY** | To identify if the DR-TB is primary or acquired | - Diagnostic journey | - Can you tell me a bit about your TB story? How did you first get diagnosed? - What kinds of thoughts and feelings were foremost in your mind when you found out your TB was drug-resistant? - What have you learned about TB and TB treatment? |
| **Health facility experiences and treatment** | Problems with healthcare facilities can perpetuate stigma and deter patients from commencing or continuing with treatment. Some treatment side effects can cause anxiety and be depressing. This will help to differentiate internal stigma from treatment side effects | - How they started the treatment - Treatment adherence - Healthcare workers - Knowledge - Personable - Side-effects | - Why have you decided to get treated at this facility? - What do you think about the care being provided? - How is your relationship with the health care workers? - How do you think HCWs view MDR-TB patients? - How long have you been taking treatment? - How do the medications affect you? - How have these side effects affected your life? - Do you feel like the medications are working? |
| **Perceived Stigma (1)** | This will give insight into the patient’s interpretation of infection control policies/practices and identify the relationship between disclosure and stigma. | - Interpretation of infection control - Disclosure | - How does it feel to be at the facility? - How is the relationship between you and your caregivers at the facility? How did you expect the care to be, and how does it compare with the reality? |
| **Experienced Stigma** | This topic will explore how the people in their lives treat them regarding their diagnosis. This will be the first aspect of stigma to be discussed as it is more objective, and then the conversation can go into more depth into the participant’s feelings. | - Community members - Microaggressions - Friends - Family | - How has your social circle responded to your diagnosis and treatment? Are they aware? How have they engaged with you since they learned? How are the relationships? (Mmm, can you tell me more specifically what you’ve felt?) - Since you learned about TB, have you changed your social relationships? - Do people in your community know that you have MDR-TB? - Have you noticed anyone that you don’t know very well treat you differently since your diagnosis? - Has your diagnosis impacted your relationship with your family? Friends? Work colleagues? How? |
| **Internalized Stigma** | The area focuses on their feelings and the impact of the experienced stigma and MDR-TB has had on them. They may have experienced some forms of mental illness, such as anxiety or depression. It will also ask about possible things that helped them | - From diagnosis (intrinsic) - From experiences (extrinsic) - Coping mechanisms - Blame/shame - Mental Illness | - How would you describe your general mood since you learned of your TB diagnosis? (probe: How so?…can you expand on that?) - How do you think this happened? - What about your partner/others? How do they think this happened? - How has the diagnosis affected you as a person? (probe: Can you give some examples?) - Has the experience of having TB changed the way that you think about yourself? (probe: Why do you think that?) |
| **Perceived Stigma (2)** | This is the second section of perceived stigma. It will focus on the potential self-imposed isolation due to perceived stigma. | - Isolation - Loss of Face | - How has MDR-TB affected you? - Do you still attend your normal social events? Why/why not? - Do you feel like you have lost confidence due to your illness? How do you think this happened? - Have you ever tried to hide your symptoms? How did you do this? |
| **Coping** | This area will identify any coping mechanisms and also assess the participant’s internal stigma by identifying ‘hopelessness’ which is a previously identifies feeling for MDR-TB patients | - Coping - Aspirations - Hopes - Plans | - When you think about your future, what do you see for the year ahead? - When you feel low, what kinds of messages or sources of strength do you draw on? (probe: Why do believe that these people, ideas, faith, etc. encourage you?) - Has there been anything in your life that has helped you to get through this difficult period in your life? - Do you have any plans for when you have completed treatment? Why/why not? - What would you like to happen next?/What do you think will happen? |
| **Policy** | This area is to identify priority areas of programmatic change | - Expert advice | - What do you think would have made your MDR-TB treatment easier? - What advice or recommendations do you have for policymakers for improving the quality of TB treatment? |
| **Closing** | Close on less emotive subjects- prepare them for follow-up. | - Expressing gratitude for their time so far - Final additions - Express gratitude again | - We’re nearly done, so thank you for your time in this interview. It has been really interesting and I have already learned a lot that will be very helpful for our study. - Is there anything else that you think I should know about or that you would like to share with me for this research? |

**Closing:** Thank you for participating in this study. It’s a privilege to hear your story. We appreciate you taking the time to discuss this sensitive and very important issue. This interview will be analyzed together with other interviews to gain an understanding of how stigma impacts MDR-TB patients, to be able to measure stigma and reduce stigma through improved MDR-TB services.
